# Supplementary material for: Landslide Susceptibility Assessment Tools v1.0.0b – Project Manager Suite: A new modular toolkit for landslide susceptibility assessment
Source: Copernicus journal article supplement (doi:10.5194/gmd-2021-247), 2021-09-23
Supplement: Supplementary file [file gmd-2021-247-RC1-supplement.pdf]

Dear authors,

thanks for the tool. I understood how much work there is behind this work and in particular I know how expensive in time is implement a standalone software, thus I appreciated very much your work. That said, the manuscript presents some incompleteness, it is sometimes not clear. It could be more schematic. I suggest some comments:

- Row 52: please indicate some examples about the codes available.
- row 53: please indicate the name of the tools. As reader I could appreciate very much a briefly overview and description of the most relevant tools for LSA.
- row 53: In spite of you cited QGIS, I cannot see any QGIS tool in the reference list (only arcgis and grass). I would suggest to cite: Titti, G.; Sarretta, A. CNR-IRPI-Padova/SZ: SZ plugin, 2020. doi:10.5281/zenodo.3843276
- Sec 2: please add a list of the main libraries that are required to use and try to cite their reference.
- Tab 1: it is not clear. If the goal is to show the functions or buttons, I think could be more useful to indicate all of them in a screenshot of the main window like Fig 3 where you can put all the indications about the utilities that you want to show.
- Fig 1a: change color of landslides that are not visible.
- Rows 147-148: it is not clear.
- sec 4.3: This section is too much technical, I suggest to try to reduce part of the information here reported into a graph which can help to understand the possible functions and leave the procedural steps to the manual that you can put on the code repository.
- Row 200: please try to explain better the cross-validation (maybe add some references).
- Row 201: May I choose to avoid the preparation process? Just curiosity
- remember to add the references of the libraries used, for example I cannot find scikit-learn reference ([Scikit-learn: Machine Learning in Python](#), Pedregosa *et al.*, JMLR 12, pp. 2825-2830, 2011.) or GDAL or matplotlib etc....
- Rows 276-277: it is not clear, explain better the use of model builder.
- An overview of the study area is missing. I cannot understand the location.
- sec 5.1: I suggest to prepare a schema to better understand the procedure.
- sec. 5.1: please explain better (maybe in the previous part) how the software does the cross-validation.
- Could you add the maps resulting from the analysis?
- From row 450 to 460 please add some references.
